# Supplementary material for: From patients to caregivers: A 38-year bibliometric study of fatigue and thematic analysis of research trends
Source: Research Square preprint supplement (doi:10.21203/rs.3.rs-8022998/v1), 2025-12-11
Supplement: Supplementary file 1 [file ef6e2d3201622c5d2ed6e978.docx]

**Supplementary Materials**

**Supplement 1.** Search strategy

**Supplement 2.** Top most global cited studies

**Supplement 3.** The BIBLIO checklist

**Supplementary 1.** Search strategy

25.06.2025

| Scopus | ( TITLE ( fatigue ) AND TITLE-ABS-KEY ( "Palliative Care" OR "Hospice Care" OR "Terminal Care" OR "Terminally Ill" OR palliati* OR terminal OR terminally AND ill* OR end AND stage AND disease* OR end-of-life* OR hospice* OR "Supportive care" OR "Comfort care" OR "Symptom management" OR "End-of-life care" OR "Hospice care" OR "Care focused on quality of life" OR "Serious illness care" ) ) | 20 |
| --- | --- | --- |
| Web of Science | <https://www.webofscience.com/wos/woscc/summary/c0a5d8e2-a317-40c1-beac-2f526d30192f-016ab86c70/relevance/1>  <https://www.webofscience.com/wos/woscc/summary/0766d6ad-1cac-49f3-bade-bed309f2a923-016aba4382/relevance/1> | 400 |

**Supplement 2.** Top most global cited studies

| **No.** | **Title** | **DOI** |
| --- | --- | --- |
|  | Cancer-Related Fatigue, Version 2.2015 | 10.6004/jnccn.2015.0122 |
|  | Interpretation of EMG changes with fatigue: facts, pitfalls, and fallacies | 10.1016/S1050-6411(02)00083-4 |
|  | A study to investigate the prevalence, severity and correlates of fatigue among patients with cancer in comparison with a control group of volunteers without cancer | 10.1023/A:1008331230608 |
|  | Effects of resistance exercise on fatigue and quality of life in breast cancer patients undergoing adjuvant chemotherapy: A randomized controlled trial | 10.1002/ijc.29383 |
|  | Palliative Care Professionals' Inner Life: Exploring the Relationships Among Awareness, Self-Care, and Compassion Satisfaction and Fatigue, Burnout, and Coping With Death | 10.1016/j.jpainsymman.2015.02.013 |
|  | The biology of cancer-related fatigue: a review of the literature | 10.1007/s00520-015-2763-0 |
|  | Patient-controlled methylphenidate for cancer fatigue: a double-blind, randomized, placebo-controlled trial | 10.1200/JCO.2005.02.8506 |
|  | Fatigue in palliative care patients -- an EAPC approach | 10.1177/0269216307085183 |
|  | Palliative Care and the Management of Common Distressing Symptoms in Advanced Cancer: Pain, Breathlessness, Nausea and Vomiting, and Fatigue | 10.1200/JCO.19.00470 |
|  | Fatigue in advanced cancer: a prospective controlled cross-sectional study | 10.1038/sj.bjc.6690236 |
|  | Predictors of pain and fatigue in the year following diagnosis among elderly cancer patients | 10.1016/S0885-3924(01)00284-6 |
|  | Understanding Compassion Satisfaction, Compassion Fatigue and Burnout: a survey of the hospice palliative care workforce | 10.1177/0269216311431311 |
|  | The symptom cluster of fatigue, pain, anxiety, and depression and the effect on the quality of life of women receiving treatment for breast cancer: a multicenter study | 10.1188/09.ONF.E205-E214 |
|  | Sleep and fatigue in multiple sclerosis | 10.1191/135248506ms1320oa |
|  | Pre-treatment symptom cluster in breast cancer patients is associated with worse sleep, fatigue and depression during chemotherapy | 10.1002/pon.1412 |
|  | Prevalence of Fatigue in Patients With Cancer: A Systematic Review and Meta-Analysis | 10.1016/j.jpainsymman.2020.07.037 |
|  | Differential effects of exercise on cancer-related fatigue during and following treatment: a meta-analysis | 10.1016/j.amepre.2012.04.027 |
|  | A randomized clinical trial of energy conservation for patients with cancer-related fatigue | 10.1002/cncr.20111 |
|  | Compassion Fatigue in Pediatric Nurses | 10.1016/j.pedn.2015.02.005 |
|  | Cancer-related fatigue: state of the science | 10.1016/j.pmrj.2010.03.024 |
|  | The effect of exercise on cancer-related fatigue in cancer survivors: a systematic review and meta-analysis | 10.2147/NDT.S150464 |
|  | The cancer rehabilitation journey: barriers to and facilitators of exercise among patients with cancer-related fatigue | 10.2522/ptj.20090278 |
|  | A longitudinal study of depression, fatigue, and sleep disturbances as a symptom cluster in women with breast cancer | 10.1016/j.jpainsymman.2014.09.009 |
|  | Phase III, Randomized, Double-Blind, Placebo-Controlled Study of Long-Acting Methylphenidate for Cancer-Related Fatigue: North Central Cancer Treatment Group NCCTG-N05C7 Trial | 10.1200/JCO.2010.28.1444 |
|  | The psychometric properties of the Swedish Multidimensional Fatigue Inventory MFI-20 in four different populations | 10.1080/02841860601009430 |
|  | Mindfulness-Based Cognitive Therapy for Psychological Distress, Fear of Cancer Recurrence, Fatigue, Spiritual Well-Being, and Quality of Life in Patients With Breast Cancer-A Randomized Controlled Trial | 10.1016/j.jpainsymman.2020.02.017 |
|  | Fatigue in levodopa-naïve subjects with Parkinson disease | 10.1212/01.wnl.0000324862.29733.69 |
|  | Fatigue in women with breast cancer receiving radiation therapy | 10.1097/00002820-199804000-00006 |
|  | Pharmacological treatments for fatigue associated with palliative care | 10.1002/14651858.CD006788.pub3 |
|  | Sleep disturbance and cancer-related fatigue symptom cluster in breast cancer patients undergoing chemotherapy | 10.1007/s00520-019-04834-w |
|  | Fatigue and physical activity in patients undergoing hematopoietic stem cell transplant | 10.1188/06.ONF.614-624 |
|  | Fludrocortisone acetate to treat neurally mediated hypotension in chronic fatigue syndrome: a randomized controlled trial | 10.1001/jama.285.1.52 |
|  | Cognitive function and fatigue after diagnosis of colorectal cancer | 10.1093/annonc/mdu448 |

**Note:** Articles with more than 100 citations based on the current bibliometric analysis

**Supplement 3.** The BIBLIO checklist

**The BIBLIO checklist for reporting the bibliometric reviews of the biomedical literature**

| **Section/Topic** | **Item No.** | **Checklist item** | **Reported on page No.** |
| --- | --- | --- | --- |
| **Title** |  |  |  |
| Identification | 1 | Identify the report as a bibliometric review in the title. | 1 |
| Issues/topics | 2 | Indicate the key issues/topics under investigation and coverage of time period. | 1 |
| **Abstract** |  |  |  |
| Structured summary | 3 | Structured summary including (as applicable): background, methods, results (key findings) and conclusions. | 1 |
| **Introduction/ Background** |  |  |  |
| Justification/ Rationale/ Explanation | 4 | Present review of existing knowledge and epidemiological information. | 2 |
| Objectives | 5 | Statement of the objective (s) or question (s). | 4 |
| **Methods** |  |  |  |
| Search engines (data sources) | 6 | Describe all information sources (such as electronic databases, contact with study authors, trial registers or other grey literature sources). | 6 |
| Search strategy | 7 | Keywords and systematization criteria (date of search, language, type of document) for the search. | Figure 1  Supplement 1 |
| Time period | 8 | The period that the review covers and the justification. | 6 |
| Eligibility criteria | 9 | Describe all inclusion and exclusion criteria; languages; study design, type of publication and time period. | 6 |
| Data refinement (data selection procedure) | 10 | Remove the irrelevant articles; inspection to eliminate duplicate and unrelated articles (after evaluation of the title, abstract and content). | 6 |
| Quality assessment (optional) | 11 | Assessment of papers by three authors and the use of assessing checklists. | N/A |
| Data synthesis | 12 | Describe the methods used for summarizing, handling, synthesis, tabulations or schematic displays. Describe how the data were analysed. | 6-7 |
| **Results** |  |  |  |
| Descriptive findings (statistics) | 13 | - Provide details of the search and selection process in a flow diagram.  - Number of citations retrieved (number of publication, year of publication, type of documents, country of publication, articles with the highest impact, most impactful authors, most impactful articles, authors with the highest production, top journals, top institutions, …) | 8 |
| Schematic map and trend | 14 | Summarize and/or present the schematic maps and trends using an appropriate software to present citations, journals, authors, top journals, time trends, emerging literature, and any relevant indicators (as applicable) [1-5]. | 8-10 |
| Tabulation and summarizing the findings | 15 | General recommendation: Studies under consideration could be summarized and organized by different subtitles and different scenarios. Regardless, results need to be presented in separate tables covering each subtitle. The followings are some options that could help to summarize the findings.  *Option 1:*  - Start the presentation with a historical view [when and who first published on the topic].  - Report on review papers. The result should be listed in a separate table. Also, specify the review type (scoping review, narrative review, systematic review, and meta-analysis).  - Summarize the findings according to the study designs and main study types.  *Option 2:*  - Start the presentation with a historical view [when and who first published on the topic].  - Report on review papers. The result should be listed in a separate table. Also, indicate the review type (scoping review, narrative review, systematic review, and meta-analysis) should be specified.  - Summarize the findings according to outcome measures or populations. For example, see [6].  *Option 3:*  - Start the presentation with a historical view [when and who first published on the topic].  - Report on review papers. The result should be listed in a separate table. Also, specify the review type (scoping review, narrative review, systematic review, and meta-analysis).  - Summarize the findings according to concept [7].  *Option 4.*  - Start the presentation with a historical view [when and who first published on the topic].  - Report on review papers. The result should be listed in a separate table, and also specify the review type (scoping review, narrative review, systematic review, and meta-analysis).  - Summarize the findings according to different subtitles relevant to the main topic [8]. | 8 |
| Synthesis of findings | 16 | Synthesize the findings as much as possible, find the gap, and propose a model, hypothesis, etc. (if applicable). | 16 |
| **Discussion** |  |  |  |
| Summary of evidence | 17 | Summarize the main findings. The findings should be presented in more "general" or "accessible" terms. | 16 |
| Interpretation | 18 | Include interpretation consistent with results. Explanations for observed outcomes, similarities, and differences reported would be essential. | 16-20 |
| Strengths and limitations | 19 | Discuss the strengths and limitations. | 20-21 |
| Conclusion(s) | 20 | Provide a general interpretation of the results with respect to the review questions and objectives, as well as potential implications. | 21 |
| 1. McDougal L, Dehingia N, Cheung WW, Dixit A, Raj A. COVID-19 burden, author affiliation and women's well-being: A bibliometric analysis of COVID-19 related publications including focus on low-and middle-income countries. eClinicalMedicine 2022; 52: 101606.  2. Henstock L, Wong R, Tsuchiya A, Spencer A. Behavioral theories that have influenced the way health state preferences are elicited and interpreted: A bibliometric mapping analysis of the ttime trade-off method with VOSviewer visualization. Front Health Serv 2022; 2: 848087.  3. Bodea F, Bungau SG, Negru AP, Radu A, Tarce AG, Tit DM, et al. Exploring new therapeutic avenues for ophthalmic disorders: Glaucoma-related molecular docking evaluation and bibliometric analysis for improved management of ocular diseases. Bioengineering 2023; 10(8): 983.  4. Sang XZ, Wang CQ, Chen W, Rong H, Hou LJ. An exhaustive analysis of post-traumatic brain injury dementia using bibliometric methodologies. Front Neurol 2023; 14: 1165059.  5. Ramli MI, Hamzaid NA, Engkasan JP, Usman J. Respiratory muscle training: a bibliometric analysis of 60 years’ multidisciplinary journey. Biomed Eng Online 2023; 22(1): 50.  6. Akosman I, Kumar N, Mortenson R, Lans A, De La Garza Ramos R, Eleswarapu A,et al. Racial differences in perioperative complications, readmissions, and mortalities after elective spine surgery in the United States: A systematic review using AI-assisted bibliometric analysis. Glob Spine J 2023: 21925682231186759.  7. Tavousi M, Mohammadi S, Sadighi J, Zarei F, Kermani RM, Rostami R, Montazeri A. Measuring health literacy: A systematic review and bibliometric analysis of instruments from 1993 to 2021. Plos One 2022; 17(7): e0271524.  8. Montazeri A. Health-related quality of life in breast cancer patients: A bibliographic review of the literature from 1974 to 2007. J Exp Clin Cancer Res 2008; 27: 32. | | | |

**Rights and permissions:** The original source of the checklist is:Montazeri A, Mohammadi S, M.Hesari P, Ghaemi M, Riazi H, Sheikhi‑Mobarakeh Z. Preliminary guideline for reporting bibliometric reviews of the biomedical literature (BIBLIO): a minimum requirements. *Systematic Reviews* 2023; 12: 239. doi.org/10.1186/s13643-023-02410-2 The article is licensed under a Creative Commons Attribution 4.0 International License (<http://creativecommons.org/licenses/by/4.0/>). A changes was made to the original checklist to add in full references to the cited sources.
